# Supplementary material
Source: PubMed Central journal article supplement (PMC2804237)
Supplement: NIHMS155258-supplement-01.pdf [file NIHMS155258-supplement-01.pdf]

## Supplementary material

Supplementary Table 1. Candidate genes and corresponding number of SNPs for Childhood Asthma Management Program (CAMP) subjects used in learning the Bayesian network.

| Gene      | Number of SNPs |
|-----------|----------------|
| AAA1      | 1              |
| AACS      | 1              |
| ACVR1B    | 1              |
| ADAM33    | 1              |
| ADCY6     | 2              |
| ADCY9     | 4              |
| ADCYAP1   | 2              |
| ADCYAP1R1 | 2              |
| ADRB2     | 3              |
| ALDH7A1   | 4              |
| ANKRD33   | 1              |
| ANKRD5    | 2              |
| AOX1      | 2              |
| AQP2      | 2              |
| AQP6      | 1              |
| ARRB1     | 2              |
| ATP2A2    | 1              |
| ATP6V0B   | 1              |
| BDKRB1    | 3              |
| BDKRB2    | 1              |
| BIN2      | 1              |
| BRD7      | 1              |
| C11ORF72  | 1              |
| C5ORF16   | 1              |
| C6ORF125  | 1              |
| CALCOCO1  | 1              |
| CAPS2     | 1              |
| CCDC97    | 1              |
| CCL11     | 1              |
| CCR5      | 1              |
| CD3E      | 1              |
| CD4       | 1              |
| CEBPA     | 3              |
| CHIT1     | 2              |
| CHRM2     | 1              |
| CHRM3     | 2              |
| CPAMD8    | 1              |
| CPM       | 1              |
| CREB1     | 2              |
| CREB3L1   | 2              |
| CREB3L2   | 1              |
| CREB5     | 9              |
| CREBL2    | 1              |
| CREM      | 1              |

Supplementary Table 1. Candidate genes and corresponding number of SNPs for Childhood Asthma Management Program (CAMP) subjects used in learning the Bayesian network (cont.).

| Gene     | Number of SNPs |
|----------|----------------|
| CRH      | 1              |
| CRHBP    | 3              |
| CRHR1    | 2              |
| CRHR2    | 2              |
| CRP      | 1              |
| CSK      | 1              |
| CSRP2    | 1              |
| CST3     | 1              |
| CTLA4    | 1              |
| CTSO     | 1              |
| CX3CR1   | 1              |
| CYP2A13  | 1              |
| CYP2C9   | 3              |
| CYP2E1   | 1              |
| CYP3A4   | 1              |
| CYP4F3   | 1              |
| DBP      | 1              |
| DCD      | 1              |
| DCTN2    | 1              |
| DDC      | 2              |
| DERL3    | 1              |
| DPP10    | 5              |
| E2F7     | 2              |
| EGR1     | 1              |
| ELA1     | 1              |
| ELF2     | 1              |
| ELF5     | 2              |
| F2RL1    | 2              |
| FAM19A2  | 1              |
| FCER2    | 3              |
| FCHSD1   | 1              |
| FKBP4    | 1              |
| FKBP5    | 1              |
| FLJ21125 | 1              |
| FLJ23436 | 1              |
| GAL      | 2              |
| GALNT6   | 1              |
| GATA3    | 2              |
| GLS2     | 1              |
| GLYCAM1  | 1              |
| GMEB1    | 1              |
| GNAI1    | 1              |
| GNAI2    | 2              |
| GNAS     | 2              |
| GNAT2    | 1              |
| GNB1     | 2              |
| GNB3     | 1              |

Supplementary Table 1. Candidate genes and corresponding number of SNPs for Childhood Asthma Management Program (CAMP) subjects used in learning the Bayesian network (cont.).

| Gene            | Number of SNPs |
|-----------------|----------------|
| <i>GNG5</i>     | 1              |
| <i>GNG7</i>     | 4              |
| <i>GNS</i>      | 1              |
| <i>GPR162</i>   | 2              |
| <i>GRB2</i>     | 1              |
| <i>GRIP1</i>    | 1              |
| <i>GRK4</i>     | 1              |
| <i>GRK5</i>     | 3              |
| <i>GRK7</i>     | 1              |
| <i>GSTP1</i>    | 1              |
| <i>HAT1</i>     | 2              |
| <i>HAVCR1</i>   | 1              |
| <i>HDAC2</i>    | 2              |
| <i>HDAC5</i>    | 1              |
| <i>HELB</i>     | 1              |
| <i>HLA-DQA1</i> | 1              |
| <i>HLA-G</i>    | 1              |
| <i>HMGA2</i>    | 1              |
| <i>HOXC13</i>   | 1              |
| <i>HSP90AA1</i> | 1              |
| <i>HTR2A</i>    | 4              |
| <i>HUMCYT2A</i> | 1              |
| <i>ICAM5</i>    | 1              |
| <i>IFNG</i>     | 1              |
| <i>IL12B</i>    | 1              |
| <i>IL12RB1</i>  | 2              |
| <i>IL12RB2</i>  | 2              |
| <i>IL13</i>     | 1              |
| <i>IL18BP</i>   | 2              |
| <i>IL26</i>     | 1              |
| <i>IL27</i>     | 1              |
| <i>IL4</i>      | 1              |
| <i>IL4R</i>     | 2              |
| <i>IL8RA</i>    | 2              |
| <i>INDO</i>     | 1              |
| <i>INDOL1</i>   | 2              |
| <i>IRAK3</i>    | 2              |
| <i>ITFG2</i>    | 1              |
| <i>ITGAL</i>    | 3              |
| <i>ITGB7</i>    | 1              |
| <i>ITPR1</i>    | 10             |
| <i>ITPR2</i>    | 9              |
| <i>ITPR3</i>    | 1              |
| <i>JAG1</i>     | 5              |
| <i>K5B</i>      | 1              |
| <i>KCNC2</i>    | 2              |
| <i>KCNMB4</i>   | 1              |

Supplementary Table 1. Candidate genes and corresponding number of SNPs for Childhood Asthma Management Program (CAMP) subjects used in learning the Bayesian network (cont.).

| Gene             | Number of SNPs |
|------------------|----------------|
| <i>KDR</i>       | 2              |
| <i>KRT3</i>      | 2              |
| <i>KRT6IRS</i>   | 1              |
| <i>KRT6L</i>     | 1              |
| <i>KRT8</i>      | 1              |
| <i>KRTHB5</i>    | 1              |
| <i>KYNU</i>      | 1              |
| <i>LEMD3</i>     | 1              |
| <i>LGR5</i>      | 1              |
| <i>LOC283400</i> | 2              |
| <i>LOC283403</i> | 1              |
| <i>LOC284890</i> | 2              |
| <i>LOC341315</i> | 1              |
| <i>LOC387894</i> | 1              |
| <i>LOC390338</i> | 1              |
| <i>LOC390342</i> | 2              |
| <i>LOC400050</i> | 2              |
| <i>LOC440098</i> | 1              |
| <i>LOC440935</i> | 1              |
| <i>LOC441121</i> | 1              |
| <i>LOC643231</i> | 1              |
| <i>LOC643625</i> | 1              |
| <i>LOC644733</i> | 1              |
| <i>LOC645253</i> | 1              |
| <i>LOC645507</i> | 3              |
| <i>LOC645738</i> | 2              |
| <i>LOC646067</i> | 1              |
| <i>LOC647071</i> | 2              |
| <i>LRIG3</i>     | 1              |
| <i>MAPK1</i>     | 1              |
| <i>MAPT</i>      | 1              |
| <i>MAST3</i>     | 1              |
| <i>MDM2</i>      | 1              |
| <i>MED11</i>     | 1              |
| <i>MFNG</i>      | 1              |
| <i>MGC4093</i>   | 1              |
| <i>MGP</i>       | 1              |
| <i>MMP12</i>     | 2              |
| <i>MS4A2</i>     | 1              |
| <i>MYO5C</i>     | 2              |
| <i>NAP1L1</i>    | 1              |
| <i>NCOA1</i>     | 3              |
| <i>NCOR2</i>     | 4              |
| <i>NFATC4</i>    | 2              |
| <i>NPSR1</i>     | 2              |
| <i>NROB2</i>     | 1              |
| <i>NR1I2</i>     | 4              |

Supplementary Table 1. Candidate genes and corresponding number of SNPs for Childhood Asthma Management Program (CAMP) subjects used in learning the Bayesian network (cont.).

| Gene            | Number of SNPs |
|-----------------|----------------|
| <i>NR3C1</i>    | 2              |
| <i>OR10P1</i>   | 1              |
| <i>OR6C68</i>   | 1              |
| <i>OS-9</i>     | 1              |
| <i>OSBPL8</i>   | 1              |
| <i>PCAF</i>     | 1              |
| <i>PDGFB</i>    | 1              |
| <i>PERQ1</i>    | 1              |
| <i>PHLDA1</i>   | 1              |
| <i>PLCB1</i>    | 10             |
| <i>PLCB2</i>    | 1              |
| <i>PLCB3</i>    | 2              |
| <i>PLCB4</i>    | 3              |
| <i>PLN</i>      | 1              |
| <i>POMC</i>     | 2              |
| <i>POU6F1</i>   | 1              |
| <i>PPM1H</i>    | 3              |
| <i>PRKCA</i>    | 6              |
| <i>PRR7</i>     | 1              |
| <i>PTAFR</i>    | 1              |
| <i>PTGDR</i>    | 2              |
| <i>PTGES</i>    | 3              |
| <i>PTGIR</i>    | 1              |
| <i>PTPRB</i>    | 2              |
| <i>PTPRR</i>    | 1              |
| <i>RAB3IP</i>   | 1              |
| <i>RAC2</i>     | 2              |
| <i>RACGAP1</i>  | 1              |
| <i>RARG</i>     | 1              |
| <i>RASSF3</i>   | 1              |
| <i>RCBTB1</i>   | 1              |
| <i>RGS12</i>    | 1              |
| <i>RGS16</i>    | 1              |
| <i>RHBDF2</i>   | 1              |
| <i>SCARB1</i>   | 4              |
| <i>SDPR</i>     | 4              |
| <i>SEMA3B</i>   | 1              |
| <i>SERPINA6</i> | 1              |
| <i>SERPINE2</i> | 1              |
| <i>SGOL1</i>    | 2              |
| <i>SLC16A7</i>  | 2              |
| <i>SLC6A4</i>   | 1              |
| <i>SMARCA4</i>  | 2              |
| <i>SMARCE1</i>  | 1              |
| <i>SRGAP1</i>   | 3              |
| <i>STAT1</i>    | 2              |
| <i>STAT2</i>    | 1              |

Supplementary Table 1. Candidate genes and corresponding number of SNPs for Childhood Asthma Management Program (CAMP) subjects used in learning the Bayesian network (cont.).

| Gene            | Number of SNPs |
|-----------------|----------------|
| <i>STAT4</i>    | 2              |
| <i>STAT6</i>    | 1              |
| <i>SYCE1</i>    | 1              |
| <i>TACR1</i>    | 3              |
| <i>TBK1</i>     | 1              |
| <i>TBX21</i>    | 3              |
| <i>TEX12</i>    | 1              |
| <i>TMEM132B</i> | 5              |
| <i>TMEM142A</i> | 2              |
| <i>TMEM19</i>   | 1              |
| <i>TPH1</i>     | 1              |
| <i>TPH2</i>     | 2              |
| <i>TRHDE</i>    | 2              |
| <i>TRIM55</i>   | 1              |
| <i>UBC</i>      | 1              |
| <i>UCN3</i>     | 1              |
| <i>USP5</i>     | 1              |
| <i>VEGF</i>     | 4              |
| <i>VMD2L3</i>   | 1              |
| <i>WARS2</i>    | 2              |
| <i>XRCC6BP1</i> | 1              |
| <i>YEATS4</i>   | 3              |

Supplementary Table 2. SNPs selected by forward stepwise logistic regression procedure to modify bronchodilator response.

| Variable    | p-value |
|-------------|---------|
| (Intercept) | 0.981   |
| rs163688    | 0.974   |
| rs11172796  | 0.972   |
| rs10779025  | 0.976   |
| rs4722804   | 0.985   |
| rs10879312  | 0.988   |
| rs739043    | 0.983   |
| rs2499618   | 0.980   |
| rs12655779  | 0.981   |
| rs4791036   | 0.987   |
| rs9309308   | 0.972   |
| rs7971621   | 0.985   |
| rs7311377   | 0.977   |
| rs2231828   | 0.981   |
| rs9468      | 0.981   |
| rs6976396   | 0.982   |
| rs725902    | 0.987   |
| rs8074995   | 0.983   |
| rs6555827   | 0.978   |
| rs10846745  | 0.981   |
| rs4512898   | 0.982   |
| rs449351    | 0.976   |
| rs1040496   | 0.976   |
| rs7583029   | 0.974   |
| rs7620481   | 0.983   |
| rs7297654   | 0.978   |
| rs2241712   | 0.974   |
| rs304011    | 0.981   |
| rs2070912   | 0.976   |
| rs7309600   | 0.980   |
| rs1057911   | 0.974   |
| rs1227275   | 0.988   |
| rs2237361   | 0.976   |
| rs2298455   | 0.983   |
| rs2296972   | 0.984   |
| rs2071084   | 0.982   |
| rs6712954   | 0.974   |
| rs10189819  | 0.980   |
| rs1033566   | 0.984   |
| rs966975    | 0.977   |
| rs4835913   | 0.975   |
| rs3804999   | 0.972   |
| rs11770792  | 0.985   |
| rs3116656   | 0.971   |
| rs8069926   | 0.976   |
| rs7000868   | 0.974   |
| rs728009    | 0.984   |
| rs153109    | 0.984   |

Supplementary Table 3. *ADRB2* SNP association results.

| SNP       | CHR | BP        | Gene         | Minor allele | Observed genotypes |           | Allelic OR | Allelic p-value | Genotypic p-value |
|-----------|-----|-----------|--------------|--------------|--------------------|-----------|------------|-----------------|-------------------|
|           |     |           |              |              | Cases*             | Controls* |            |                 |                   |
| rs1036174 | 5   | 148233754 | <i>ADRB2</i> | 1            | 22/53/38           | 23/110/62 | 1.13       | 0.48            | 0.12              |
| rs1042719 | 5   | 148187640 | <i>ADRB2</i> | 2            | 8/48/57            | 15/89/91  | 0.90       | 0.57            | 0.82              |
| rs1432627 | 5   | 148227771 | <i>ADRB2</i> | 1            | 7/33/73            | 12/70/113 | 0.83       | 0.35            | 0.48              |

\*Shows homozygous minor/heterozygous/homozygous major allele genotype counts.  
BP: Base pair; CHR: Chromosome; OR: Odds ratio.
